# Supplementary material for: Betaine: A Potential Nutritional Metabolite in the Poultry Industry
Source: MDPI journal article supplement (doi:10.3390/ani12192624), 2022-09-30
Supplement: s1 [file s1]

Review

# Betaine: A Potential Nutritional Metabolite in the Poultry Industry

Wafaa A. Abd El-Ghany <sup>1,†</sup> and Daryoush Babazadeh <sup>2,\*,†,‡</sup>

<sup>1</sup> Poultry Diseases Department, Faculty of Veterinary Medicine, Cairo University, Giza 12211, Egypt;

<sup>2</sup> Faculty of Veterinary Medicine, Shiraz University, Shiraz P.O. Box 71964-84334, Iran

\* Correspondence: [daryoushbabazadeh@shirazu.ac.ir](mailto:daryoushbabazadeh@shirazu.ac.ir); [daryoushbabazadeh@gmail.com](mailto:daryoushbabazadeh@gmail.com)

† ORCID: 0000-0003-1686-3831 (W.A.A.E.-G.); ORCID: 0000-0003-1118-2295 (D.B.)

‡ Tel.: +98-9147697527

Citation: El-Ghany, W.A.A.; Babazadeh, D. Betaine: A Potential Nutritional Metabolite in the Poultry Industry. *Animals* 2022, 12, 2624. <https://doi.org/10.3390/ani12192624>

Academic Editor: Anna Arczewska-Włosek

Received: 24 August 2022

Accepted: 26 September 2022

Published: 30 September 2022

**Publisher's Note:** MDPI stays neutral with regard to jurisdictional claims in published maps and institutional affiliations.

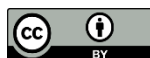

**Copyright:** © 2022 by the authors. Submitted for possible open access publication under the terms and conditions of the Creative Commons Attribution (CC BY) license (<https://creativecommons.org/licenses/by/4.0/>).

**Table S1.** Effects of dietary supplementation of betaine on the growth parameters of broiler chickens.

| Concentration of betaine/kg diet                                         | Effect                                                                                                             | Reference                     |
|--------------------------------------------------------------------------|--------------------------------------------------------------------------------------------------------------------|-------------------------------|
| 0.05–0.15 mg/kg                                                          | Improvement of average body weight gain                                                                            | 73, 108                       |
| 0.5–1 g/kg                                                               | Significant positive effects on body weight gain, feed intake, feed conversion rate, and viability rate            | 45, 94                        |
| 1–2 g/kg                                                                 | Significant improvement in the body weight, body weight gain, and feed conversion ratio and reduced mortality rate | 19, 30, 61, 94, 110, 135, 142 |
| 2–4 g/kg                                                                 | Significant positive effects on body weight gain                                                                   | 111                           |
| 800 mg/kg + methionine 15, 18, 20, 22, and 24 g/kg                       | Significant increase in body weight gain at 21 days of age                                                         | 51                            |
| <i>In ovo</i> injection at dosage of 0.25 ml with 0.5 ml deionized water | Improved hatching weight and final weight                                                                          | 109                           |
